# Supplementary material
Source: PubMed Central journal article supplement (PMC3763518)
Supplement: ic401573d_si_001.pdf [file ic401573d_si_001.pdf]

# Supporting Information

## Dicopper(II) and Dizinc(II) Complexes with Nonsymmetric Dinucleating Ligands Based on Indolo[3,2-*c*]quinolines: Synthesis, Structure, Cytotoxicity and Intracellular Distribution

Michael F. Primik,<sup>#</sup> Simone Göschl,<sup>#</sup> Samuel M. Meier,<sup>#</sup> Nadine Eberherr,<sup>#</sup> Michael A. Jakupec,<sup>#</sup> Éva  
A. Enyedy,<sup>‡,†</sup> Ghenadie Novitchi,<sup>§</sup> Vladimir B. Arion<sup>\*,#</sup>

E-mail: vladimir.arion@univie.ac.at

<sup>#</sup>Institute of Inorganic Chemistry, University of Vienna, Währinger Str. 42, A-1090 Vienna, Austria

<sup>‡</sup>Department of Inorganic and Analytical Chemistry, University of Szeged, Dóm tér 7, H-6720, Szeged,  
Hungary

<sup>†</sup>HAS-USZ Bioinorganic Chemistry Research Group, Dóm tér 7, H-6720, Szeged, Hungary

<sup>§</sup>Laboratoire National des Champs Magnétiques Intenses-CNRS, 25 Avenue des Martyrs, F-38042  
Grenoble Cedex 9, France

|                                                     | Page number |
|-----------------------------------------------------|-------------|
| Synthesis and NMR characterization of intermediates | S2          |

| Figure                                                                                                                                                |     |
|-------------------------------------------------------------------------------------------------------------------------------------------------------|-----|
| S1: UV-vis spectra of $\text{EtOOC-HL-COOEt}$ , <b>1</b> and <b>2</b> in methanol.                                                                    | S5  |
| S2: UV-vis absorbance spectrum of the ligand $\text{EtOOC-HL-COOEt}$ and its changes by the addition of copper(II) (solid traces) in methanol.        | S5  |
| S3: ESI mass spectra in the positive ion mode of <b>1</b> (A) and <b>2</b> (B).                                                                       | S6  |
| S4: Details on isotopic distributions of the major detected mass signals of <b>1</b> (A) and <b>2</b> (B) and respective simulations ( <i>grey</i> ). | S7  |
| S5: The impact of lowering the pH of the incubation solution for <b>1</b> (A) and <b>2</b> (B).                                                       | S8  |
| S6: Fluorescence excitation and emission spectra of 10 $\mu\text{M}$ solutions of $\text{EtOOC-HL-COOEt}$ and <b>2</b> at physiological pH            | S9  |
| S7: Concentration-effect curves of $\text{EtOOC-HL-COOEt}$ and complexes <b>1</b> and <b>2</b> , in human cancer cell lines                           | S10 |

|                                                         |     |
|---------------------------------------------------------|-----|
| Table S1: The experimental masses and their assignment. | S11 |
|---------------------------------------------------------|-----|

## Synthesis and NMR characterization of starting compounds and intermediates

Indolo[3,2-*c*]quinoline precursors were synthesized as described by Filak et al. (*Organometallics* **2011**, *30*, 273–283) and Primik et al. (*Inorg. Chem.* **2010**, *42*, 11084–11095).

### 5*H*-Indolo[3,2-*c*]quinolin-6(11*H*)-one

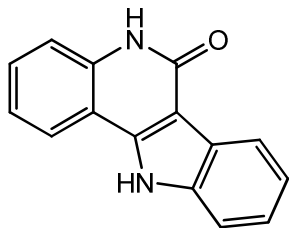

A mixture of isatin (10.2 g, 69.3 mmol) and 2-aminobenzylamine (9.0 g, 73.7 mmol) in glacial acetic acid (85 mL) was heated at 144 °C for 4 h under argon atmosphere. The solution was allowed to cool to room temperature generating a brown precipitate which was filtered, washed with cold acetic acid (3 × 5 mL) and water (twice 20 mL), and dried at 95 °C *in vacuo*. Yield: 12.3 g (80%). <sup>1</sup>H NMR 500.13 MHz (DMSO-*d*<sub>6</sub>, δ<sub>H</sub>, ppm): 12.55 (s, 1H, N11), 11.42 (s, 1H, N5), 8.23-8.18 (m, 2H), 7.63 (d, 1H, <sup>3</sup>*J* = 7.9 Hz), 7.54 – 7.45 (m, 2H), 7.40-7.35 (m, 1H), 7.33-7.25 (m, 2H).

### 6-Chloro-11*H*-indolo[3,2-*c*]quinoline

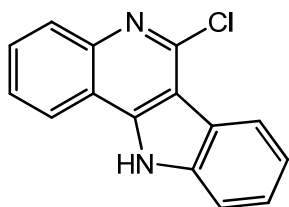

A suspension of 5*H*-Indolo[3,2-*c*]quinolin-6(11*H*)-one (3.0 g, 13.0 mmol) in POCl<sub>3</sub> (40 mL) was refluxed at 130 °C for 26 h under argon atmosphere. The solution was allowed to cool to room temperature and was poured onto ice (300 mL) and slowly neutralized with solid sodium hydroxide until a pH of 7–8 was reached. The resulting aqueous suspension was extracted with ethyl acetate (5 × 200 mL). The combined organic phases were washed with 5% NaHCO<sub>3</sub> aqueous solution (2 × 250 mL) and dried over Na<sub>2</sub>SO<sub>4</sub>. The solvent light beige product was isolated by removal of the solvent under reduced pressure and dried *in vacuo* overnight. Yield: 3.1 g (95%). <sup>1</sup>H NMR 500.13 MHz (DMSO-*d*<sub>6</sub>,

$\delta_{\text{H}}$ , ppm): 13.13 (s, 1H, N11), 8.57 (d, 1H,  $^3J = 8.2$  Hz), 8.45 (d, 1H,  $^3J = 7.8$  Hz), 8.07 (d, 1H,  $^3J = 8.3$  Hz), 7.84-7.73 (m, 3H), 7.61 – 7.56 (m, 1H), 7.46 – 7.41 (m, 1H).

6-Hydrazinyl-11H-indolo[3,2-c]quinoline

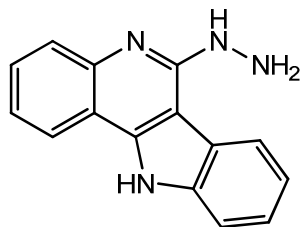

To 6-chloro-11H-indolo[3,2-c]quinoline (3.0 g, 11.9 mmol) hydrazine hydrate (50 mL) as reagent and solvent was added and the reaction mixture heated at 115 °C for 24 h under argon atmosphere. After cooling to room temperature, the resulting beige precipitate was filtered off, washed with water (2 × 10 mL), ethyl acetate and dried *in vacuo*. Yield: 2.8 g (95%).  $^1\text{H}$  NMR 500.13 MHz (DMSO- $d_6$ ,  $\delta_{\text{H}}$ , ppm): 12.48 (bs, 1H, N11), 8.35 (d, 1H,  $^3J = 8.2$  Hz), 8.28 (d, 1H,  $^3J = 7.8$  Hz), 8.03 (bs, 1H, N12), 7.76 (d, 1H,  $^3J = 7.8$  Hz), 7.65 (d, 1H,  $^3J = 7.3$  Hz), 7.57-7.51 (m, 1H), 7.43 – 7.37 (m, 1H), 7.36 – 7.30 (m, 1H), 7.29-7.23 (m, 1H), 4.73 (bs, 1H, N13).

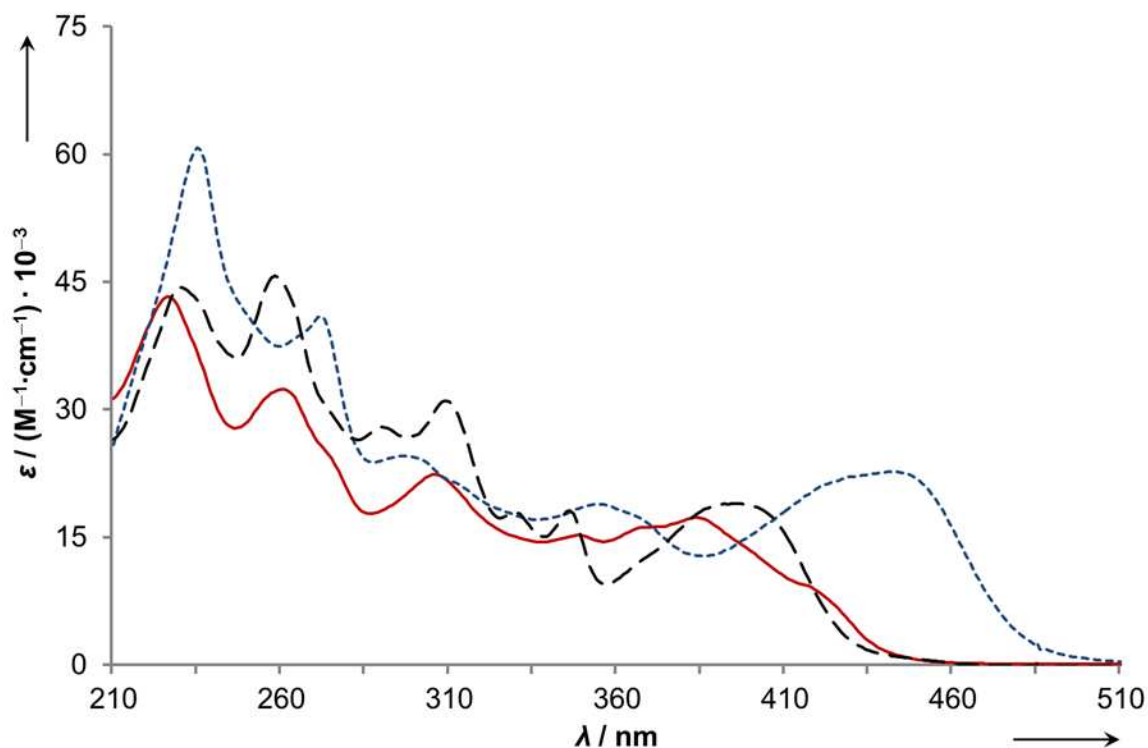

**Figure S1.** UV-vis spectra of 10  $\mu\text{M}$  solutions of  $\text{EtOOC-HL-COOEt}$  (red/solid trace), **1** (blue/shortly dashed trace) and **2** (black, long dashed trace) in methanol.

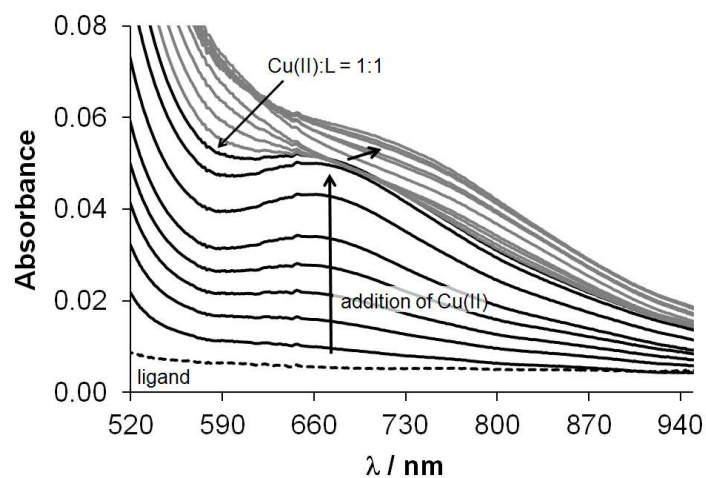

**Figure S2.** UV-vis absorbance spectrum of the ligand  $\text{EtOOC-HL-COOEt}$  (dashed trace) and its changes by the addition of copper(II) (solid traces) in methanol ( $c_L = 250 \mu\text{M}$ ;  $c_{\text{Cu}} = 0 - 562.5 \mu\text{M}$ ;  $T = 298 \text{ K}$ ;  $l = 1 \text{ cm}$ ).

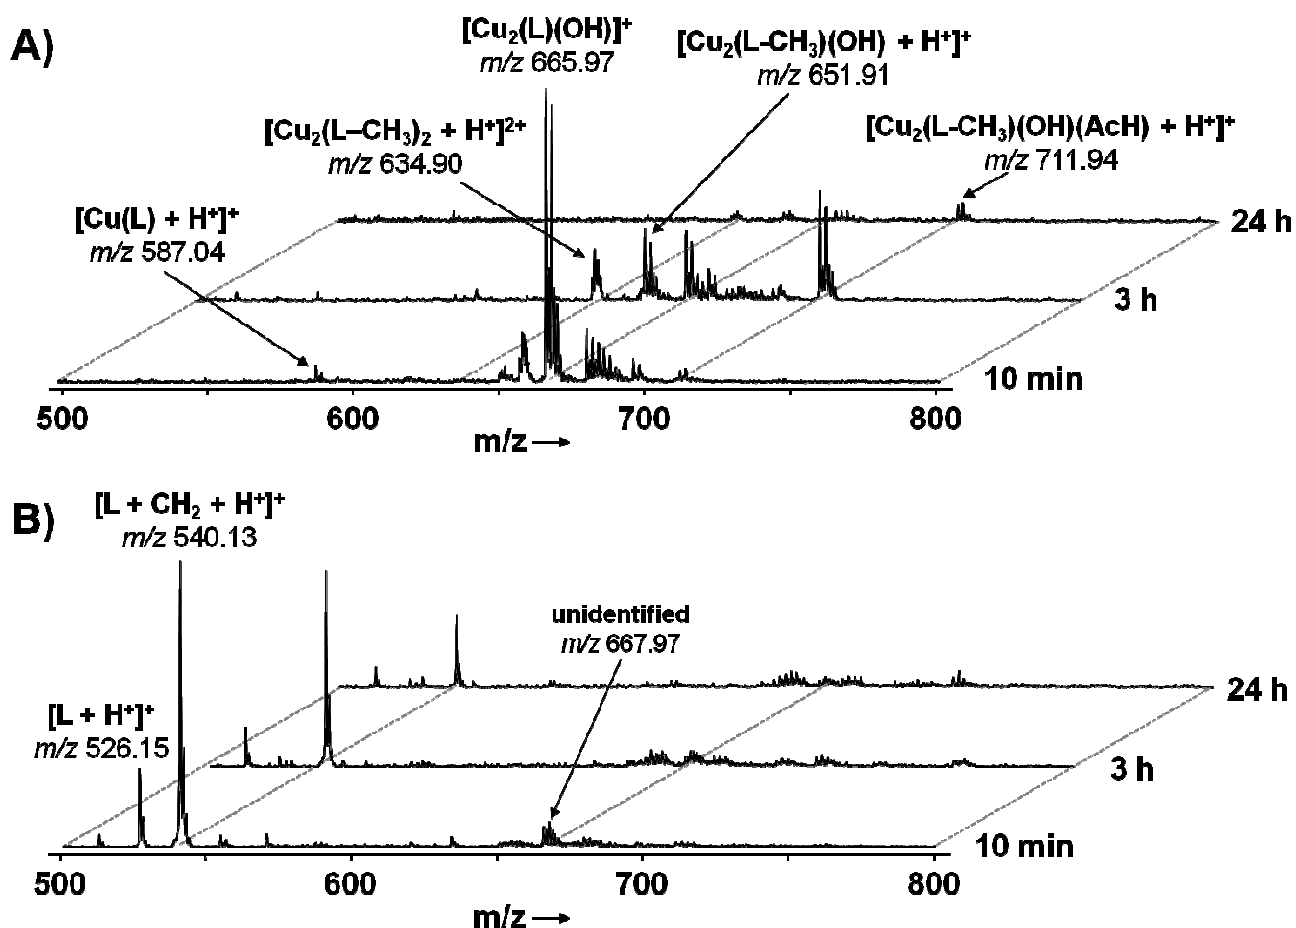

**Figure S3.** The ESI mass spectra in the positive ion mode of 1 (A) and 2 (B) are shown. Complex 2 does not ionize in the positive ion mode. Positive ion mode (HV  $-4.5$  kV, RF level 89%, trap drive 74.4, dry temperature  $250$  °C, nebulizer 8 psi, dry gas 6 L/min and average accumulation time  $144$   $\mu\text{s}$ ), diluted with water : methanol (50 : 50).

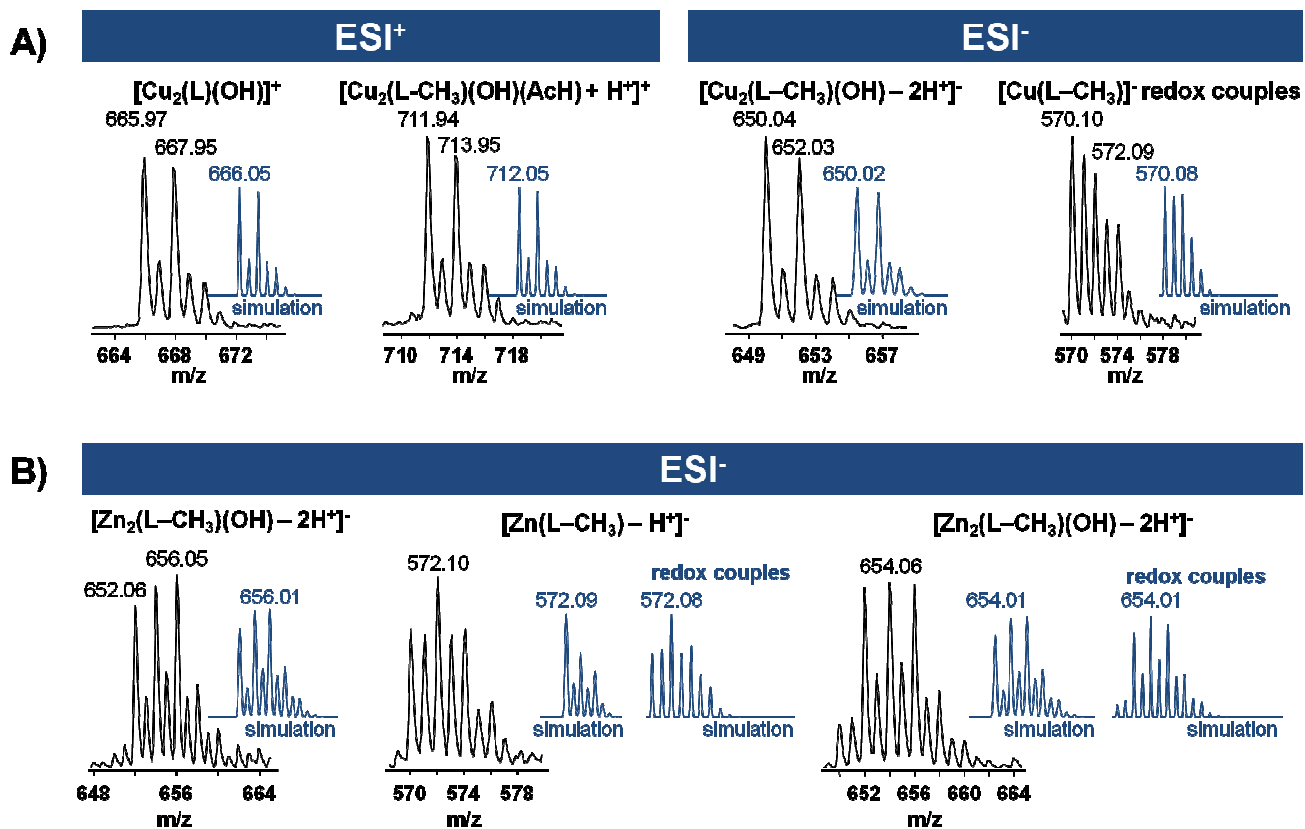

**Figure S4.** Details on isotopic distributions of the major detected mass signals of **1** (A) and **2** (B) and respective simulations (*grey*).

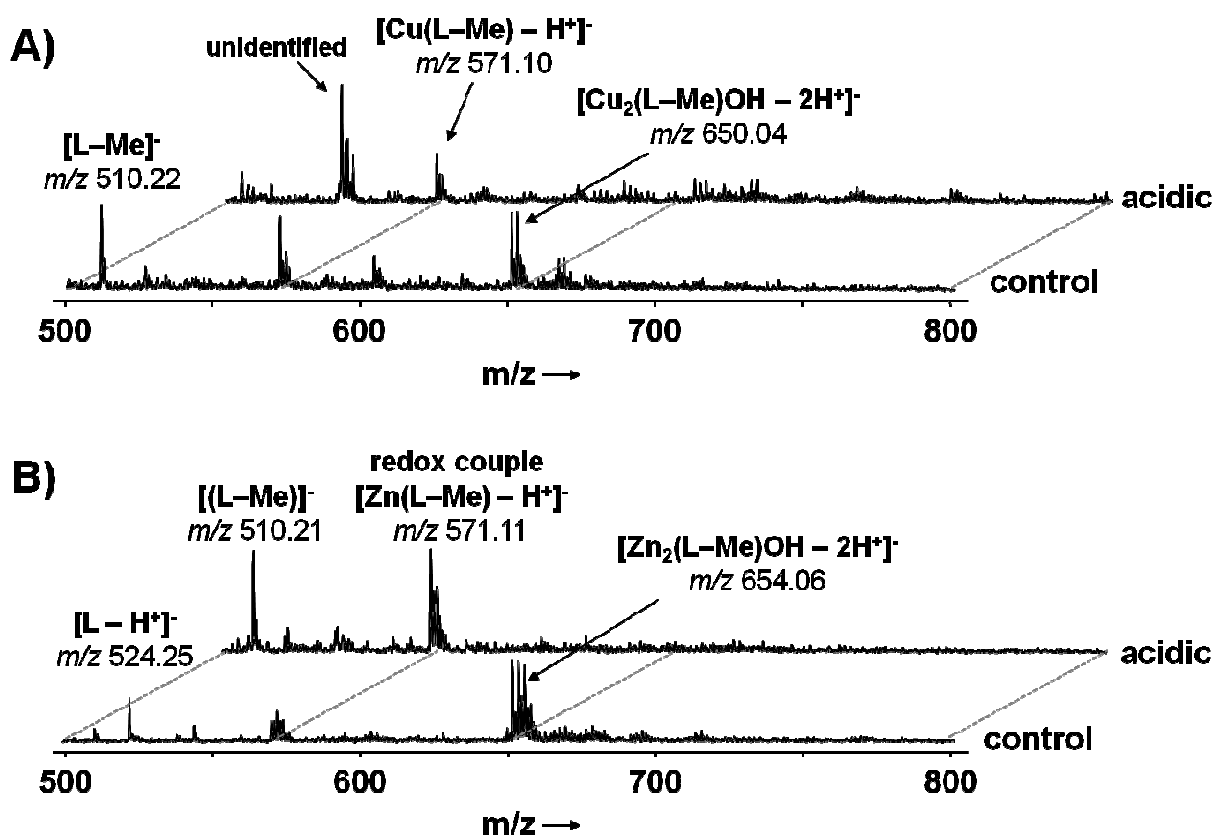

**Figure S5.** The impact of lowering the pH of the incubation solution is shown for **1** (A) and **2** (B). The control mass spectrum is recorded after 24 h of incubation, followed by acidification of solutions with formic acid and immediate measuring thereafter. Acidic conditions seem to lead to release of one metal-equivalent. Negative ion mode (HV 4.5 kV, RF level 89%, trap drive 63.8, dry temperature 250 °C, nebulizer 8 psi, dry gas 6 L/min and average accumulation time 2 ms), diluted with water : methanol : formic acid (50 : 50 : 0.2).



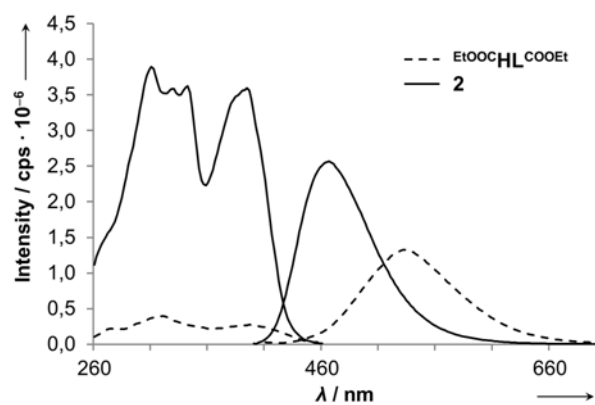

**Figure S6.** Fluorescence excitation ( $\lambda_{em} = 470$  nm) and emission ( $\lambda_{ex} = 395$  nm) spectra of 10  $\mu$ M solutions of  $EtOOC\text{-HL-COOEt}$  (dashed traces) and **2** (solid traces) at physiological pH (20 mM HEPES buffer, 1% v/v DMSO).

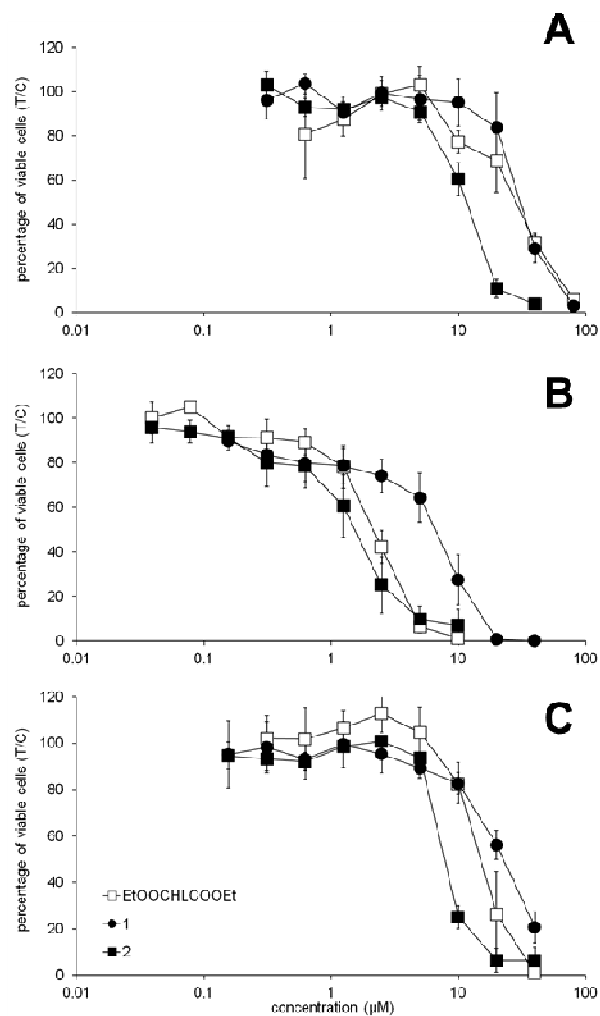

**Figure S7.** Concentration-effect curves of  $\text{EtOOC-HL-COOEt}$ , complexes **1** and **2**, in the human cancer cell lines A549 (A), CH1 (B) and SW480 (C), determined by the MTT assay using continuous exposure for 96 h.

**Table S1.** The experimental masses and their assignment.

|                  | <b>ion</b>                          | <b><i>m/z</i></b> | <b><i>m</i><sub>theor</sub></b> |
|------------------|-------------------------------------|-------------------|---------------------------------|
| ESI <sup>+</sup> | $[(L-Me) + H^+]^+$                  | $512.17 \pm 0.04$ | 512.19                          |
|                  | $[L + H^+]^+$                       | $526.21 \pm 0.01$ | 526.21                          |
|                  | unidentified                        | $540.12 \pm 0.01$ | 540.22                          |
|                  | $[Cu(L) + H^+]^+$                   | $587.04 \pm 0.03$ | 587.12                          |
|                  | $[Cu_2(L-Me)_2]^{2+}$               | $634.90 \pm 0.02$ | 635.02                          |
|                  | $[Cu_2(L-Me)(OH) + H^+]^+$          | $651.92 \pm 0.03$ | 652.03                          |
|                  | $[Cu_2(L)(OH)]^+$                   | $665.97 \pm 0.01$ | 666.05                          |
|                  | $[Cu_2(L)(CH_3O)]^+$                | $679.97 \pm 0.02$ | 680.06                          |
|                  | $[Cu_2(L-Me)(CH_3O)(HOAc) + H^+]^+$ | $711.92 \pm 0.06$ | 712.05                          |
| ESI <sup>-</sup> | $[L-Me]^-$                          | $510.22 \pm 0.04$ | 510.14                          |
|                  | $[L - H^+]^-$                       | $524.24 \pm 0.01$ | 524.19                          |
|                  | unidentified                        | $538.25 \pm 0.02$ | 538.21                          |
|                  | $[Cu(L-Me)]^-$                      | $571.10 \pm 0.06$ | 571.09                          |
|                  | $[Zn(L-Me)]^-$                      | $572.13 \pm 0.01$ | 572.09                          |
|                  | $[Cu(L) + H^+]^-$                   | $585.15 \pm 0.02$ | 585.11                          |
|                  | $[Cu_2(L-Me)(OH)]^-$                | $650.04 \pm 0.02$ | 650.02                          |
|                  | $[Zn_2(L) - H^+]^-$                 | 654.06            | 654.03                          |
|                  | $[Zn_2(L-Me)(OH)]^-$                | $656.04 \pm 0.01$ | 656.01                          |
|                  | $[Cu_2(L)(OH) - 2H^+]^-$            | 664.05            | 664.03                          |
|                  | $[Zn_2(L) - OH]^-$                  | 668.05            | 668.03                          |
|                  | $[Zn_2(L-Me)(OAc)]^-$               | 696.03            | 696.01                          |
